# Supplementary material for: Hierarchical organization from self-assembling disulfide macrocycles
Source: Royal Society of Chemistry journal article supplement (doi:10.1039/c2cc30337j), 2012-01-01
Supplement: c2cc30337j.pdf [file c2cc30337j.pdf]

## Electronic Supplementary Information

### Hierarchical organization from self-assembling disulfide macrocycles

V. Haridas\*, Srikanta Sahu and Appa Rao Sapala

Department of Chemistry, Indian Institute of Technology, New Delhi-110016, India.

|                                                  |    |
|--------------------------------------------------|----|
| Preparation of <b>3</b> and <b>4</b>             | 2  |
| Preparation of macrocycles <b>6</b> and <b>7</b> | 3  |
| Spectral data                                    | 5  |
| Microscopy Methods                               | 11 |
| Microscopy images                                | 12 |
| UV and CD spectra of <b>3</b>                    | 15 |
| Gelation Table                                   | 16 |
| Aggregation studies                              | 17 |
| PXRD spectra of macrocycle <b>3</b>              | 18 |
| DLS data and gel image                           | 19 |

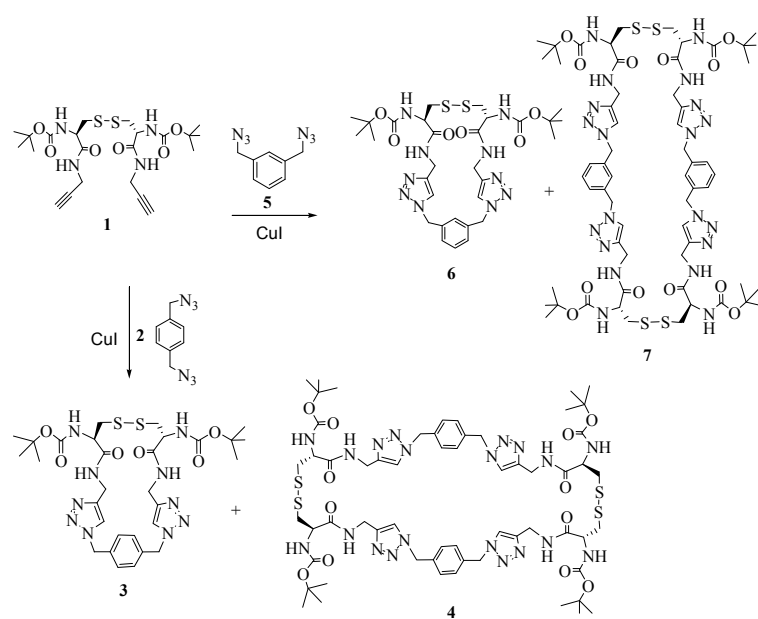

Scheme 1

### Preparation of 3 and 4

To an ice cold solution of **1** (510 mg, 0.993 mmol) in dry acetonitrile was added diisopropyl ethylamine (0.34 mL, 1.99 mmol), followed by compound **2** (186.54 mg, 0.993 mmol) under N<sub>2</sub> atmosphere. N<sub>2</sub> gas was bubbled for 15 minutes and then CuI (18.9 mg, 0.099 mmol) was added into it and stirred it for ~24 h under N<sub>2</sub> atmosphere. Filtered the reaction mixture and the residue obtained was washed with saturated solution of NH<sub>4</sub>Cl: NH<sub>4</sub>OH (9:1), 2N H<sub>2</sub>SO<sub>4</sub>, saturated solution of NaHCO<sub>3</sub>, water and finally with acetone. The residue was then dried to yield 300 mg of compound **3** and **4**.

Filtrate was evaporated and re dissolved in chloroform and washed with saturated solution of NH<sub>4</sub>Cl: NH<sub>4</sub>OH (9:1), 2N H<sub>2</sub>SO<sub>4</sub>, saturated solution of NaHCO<sub>3</sub> and water. The organic layer was dried over Na<sub>2</sub>SO<sub>4</sub> and then evaporated to give 223 mg of the compound. The crude products were purified by silica gel column chromatography using CHCl<sub>3</sub>/CH<sub>3</sub>OH.

### Data of 3

Yield 45 %

Mp: 226-228 °C

<sup>1</sup>H NMR (CDCl<sub>3</sub>, 300 MHz) δ 1.37 (s, 18H), 2.86 (m, 4H), 4.10 (d, J = 13.2 Hz, 2H), 4.69 (m, 2H), 5.01 (m, 2H), 5.25 (d, J = 14.7 Hz, 2H), 5.42 (d, J = 9.9 Hz, 2H), 5.69 (d, J = 14.7 Hz, 2H), 7.31 (s, 4H), 8.09 (br d, J = 7.5 Hz, 2H).

$^{13}\text{C}$  NMR ( $\text{CDCl}_3$ , 75 MHz)  $\delta$  28.3, 35.3, 47.4, 53.9, 54.6, 80.6, 121.2, 129.6, 135.3, 146.4, 156.0, 170.2.

IR (KBr): 3332, 2929, 2852, 1664, 1627, 1575, 1524, 1437, 1374, 1315, 1242, 1171  $\text{cm}^{-1}$ .

HRMS: Calcd for  $\text{C}_{30}\text{H}_{42}\text{N}_{10}\text{O}_6\text{S}_2\text{Na}$   $m/z = 725.2628$ , found  $m/z = 725.2631$ .

#### Data of 4

Yield: 12 %

Mp: 158-162 °C. (pls. check it in day time again).

$^1\text{H}$  NMR ( $\text{CDCl}_3+\text{CD}_3\text{OD}$ , 300 MHz)  $\delta$  1.39 (s+s, 36H), 2.96 (m, 8H), 3.68 (s, 8H), 4.44 (m, 4H), 5.46 (s, 8H), 6.19 (br d, 4H), 7.20 (s, 8H), 7.67 (s, 4H), 8.36 (br d, 4H).

$^1\text{H}$  NMR ( $\text{DMSO}-d_6$ , 300 MHz)  $\delta$  1.34 (s, 36H), 2.80 (m, 4H), 3.01 (m, 4H), 4.17 (br s, 4H), 4.28 (s, 8H), 5.51 (s, 8H), 7.05 (br d,  $J = 7.8$  Hz, 4H), 7.26 (s, 8H), 7.87 (s, 4H), 8.46 (br s, 4H).

$^{13}\text{C}$  NMR ( $\text{CDCl}_3$ , 75 MHz)  $\delta$  28.6, 34.9, 52.8, 53.9, 78.9, 123.3, 128.8, 136.4, 145.6, 155.8, 170.9.

IR (KBr): 3361, 2976, 2927, 1667, 1520, 1369, 1323, 1248, 1176, 1052  $\text{cm}^{-1}$ .

HRMS: Calcd for  $\text{C}_{60}\text{H}_{84}\text{N}_{20}\text{O}_{12}\text{S}_4\text{Na}$   $m/z = 1427.5358$ , found  $m/z = 1427.5329$ .

#### Preparation of macrocycles 6 and 7

To an ice cold solution of **1** (510 mg, 0.993 mmol) in dry acetonitrile was added diisopropyl ethylamine (0.34 mL, 1.99 mmol), followed by compound **5** (186.54 mg, 0.993 mmol) under  $\text{N}_2$  atmosphere.  $\text{N}_2$  gas was bubbled for 15 minutes and then  $\text{CuI}$  (18.9 mg, 0.099 mmol) was added into it and stirred it for ~24 h under  $\text{N}_2$  atmosphere. Filtered the reaction mixture and the residue obtained was washed with saturated solution of  $\text{NH}_4\text{Cl}$ :  $\text{NH}_4\text{OH}$  (9:1), 2N  $\text{H}_2\text{SO}_4$ , saturated solution of  $\text{NaHCO}_3$ , water and finally with acetone. The residue was then dried to yield 300 mg of compound.

Filtrate was evaporated and re dissolved in chloroform and washed with saturated solution of  $\text{NH}_4\text{Cl}$ : $\text{NH}_4\text{OH}$  (9:1), 2N  $\text{H}_2\text{SO}_4$ , saturated solution of  $\text{NaHCO}_3$  and water. The organic layer was dried over  $\text{Na}_2\text{SO}_4$  and then evaporated to give 223 mg of the compound. The crude mixture was purified by column chromatography using  $\text{CHCl}_3/\text{CH}_3\text{OH}$  to afford pure **6** and **7**.

#### Data for 6

Yield: 49 %

Mp: 169-170 °C.

<sup>1</sup>H NMR (CDCl<sub>3</sub>, 300 MHz) δ 1.33 (s, 18H), 2.94 (br s, 4H), 4.19 (d, J = 14.7 Hz, 2H), 4.67 (m, 2H), 5.00 (m, 2H), 5.37 (m, 4H), 5.59 (d, J = 14.7 Hz, 2H), 7.10 (s, 1H), 7.24 (s, 3H), 7.37 (br s, 3H), 8.24 (br s, 2H).

<sup>13</sup>C NMR (CDCl<sub>3</sub>+DMSO-*d*<sub>6</sub>, 75 MHz) δ 28.2, 35.1, 42.8, 53.3, 54.4, 79.8, 122.0, 126.5, 128.2, 129.5, 135.9, 145.9, 155.7, 170.8.

IR (KBr): 3546, 3361, 2977, 2930, 1673, 1517, 1451, 1377, 1284, 1170, 1054 cm<sup>-1</sup>.

HRMS: Calcd for C<sub>30</sub>H<sub>42</sub>N<sub>10</sub>O<sub>6</sub>S<sub>2</sub>Na m/z = 725.2628, found m/z = 725.2602.

#### Data of compound 7

Yield: 13 %

Mp: 193-197 °C.

<sup>1</sup>H NMR (CDCl<sub>3</sub>+CD<sub>3</sub>OD, 300 MHz) δ 1.39 (s+s, 36H), 2.98 (m, 8H), 3.79 (s, 8H), 4.45 (br m, 4H), 5.46 (d, J = 4.2 Hz, 8H), 6.31 (br s, 4H), 7.08 (s, 2H), 7.26 (br s, 4H), 7.33 (m, 2H), 7.69 (s, 4H), 8.39 (br d, J = 13.8 Hz, 4H).

<sup>13</sup>C NMR (DMSO-*d*<sub>6</sub>, 75 MHz) δ 33.3, 39.7, 57.7, 58.6, 58.8, 83.5, 83.62, 128.2, 132.7, 132.9, 134.4, 141.7, 150.3, 160.5, 175.5, 175.6.

<sup>1</sup>H NMR (DMSO-*d*<sub>6</sub>, 300 MHz) δ 1.49 (s, 36H), 3.00 (m, 4H), 3.18 (m, 4H), 4.33 (br s, 4H), 4.44 (s, 8H), 5.67 (s, 8H), 7.21 (d, J = 7.5 Hz, 3H), 7.34 (m, 4H), 7.46 (m, 4H), 8.04 (s, 2H), 8.64 (br s, 4H).

IR (KBr): 3331, 2977, 2930, 1691, 1662, 1526, 1456, 1369, 1316, 1245, 1169, 1053 cm<sup>-1</sup>.

HRMS: Calcd for C<sub>60</sub>H<sub>85</sub>N<sub>20</sub>O<sub>12</sub>S<sub>4</sub> m/z = 1405.5539, found m/z = 1405.5536.

### Spectral data

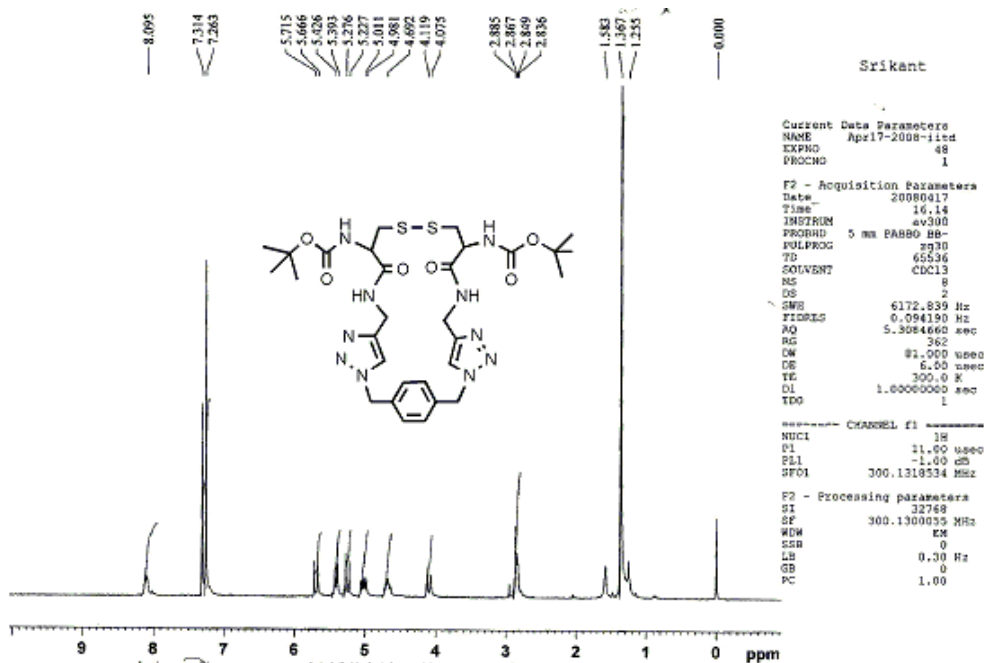

$^1\text{H}$  NMR (300 MHz,  $\text{CDCl}_3$ ) spectrum of compound 3

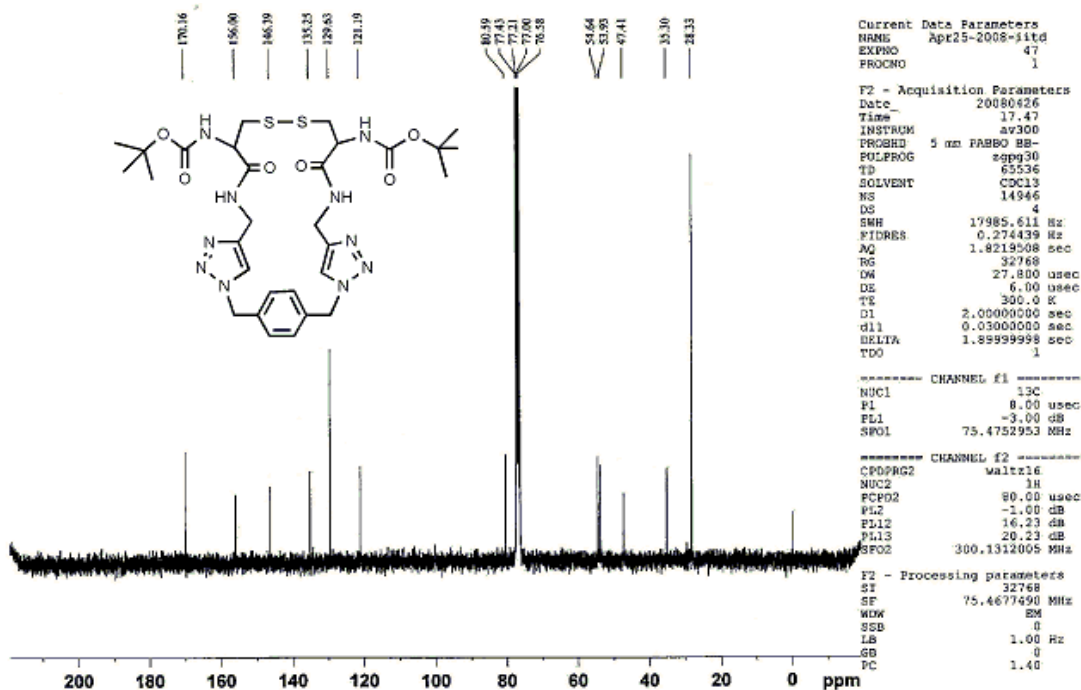

$^{13}\text{C}$  NMR (75 MHz,  $\text{CDCl}_3$ ) spectrum of compound 3

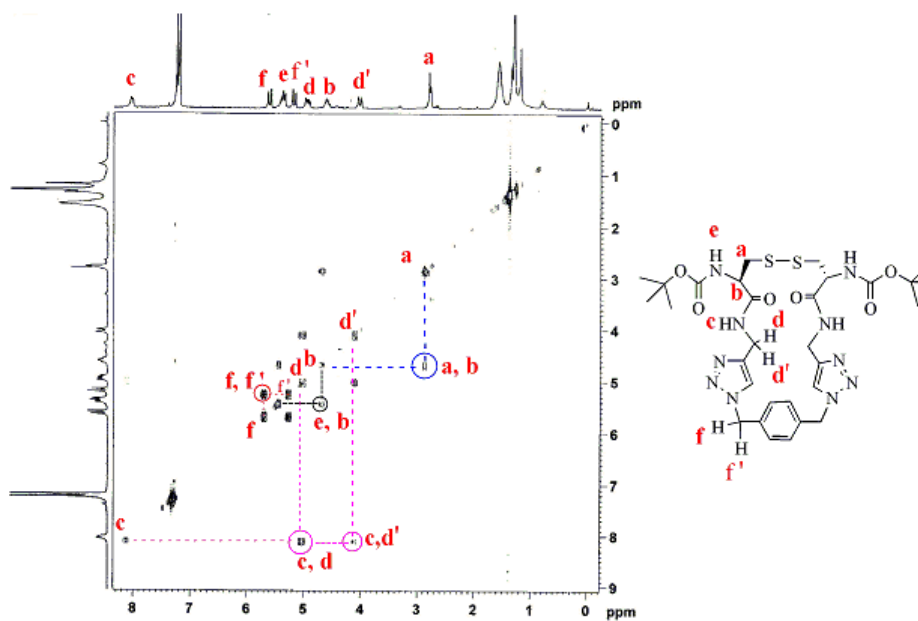

COSY spectrum of compound 3

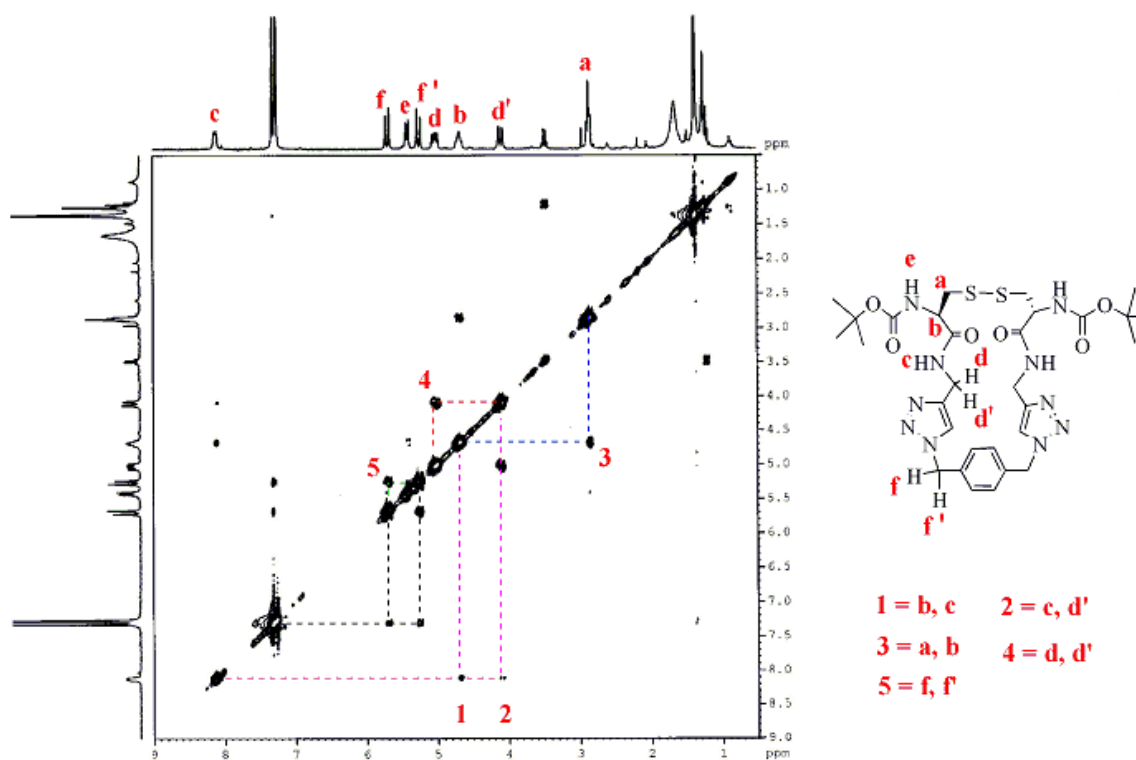

ROESY spectrum of compound 3

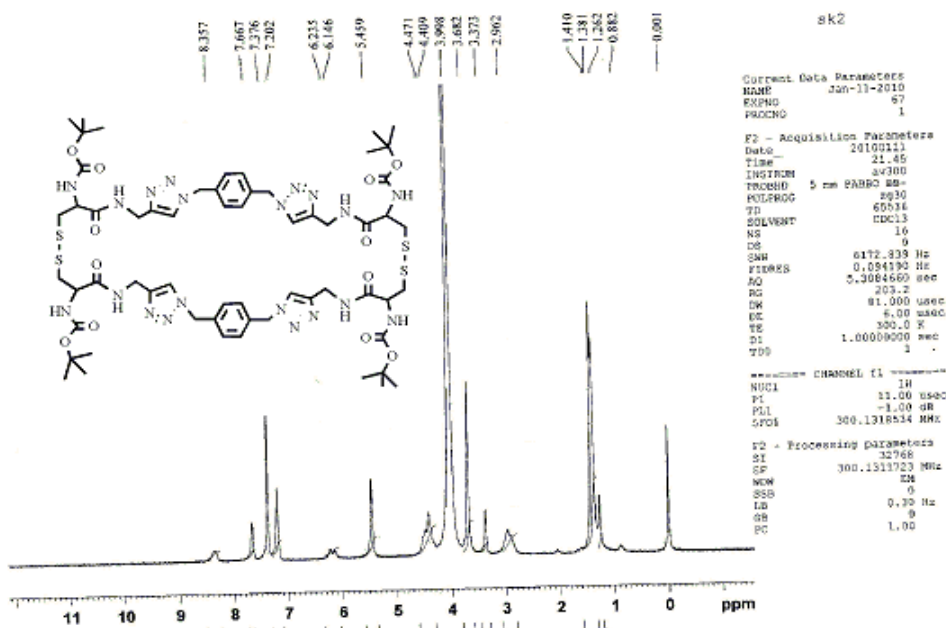

<sup>1</sup>H NMR (300 MHz, CDCl<sub>3</sub>+CD<sub>3</sub>OD) spectrum of compound 4

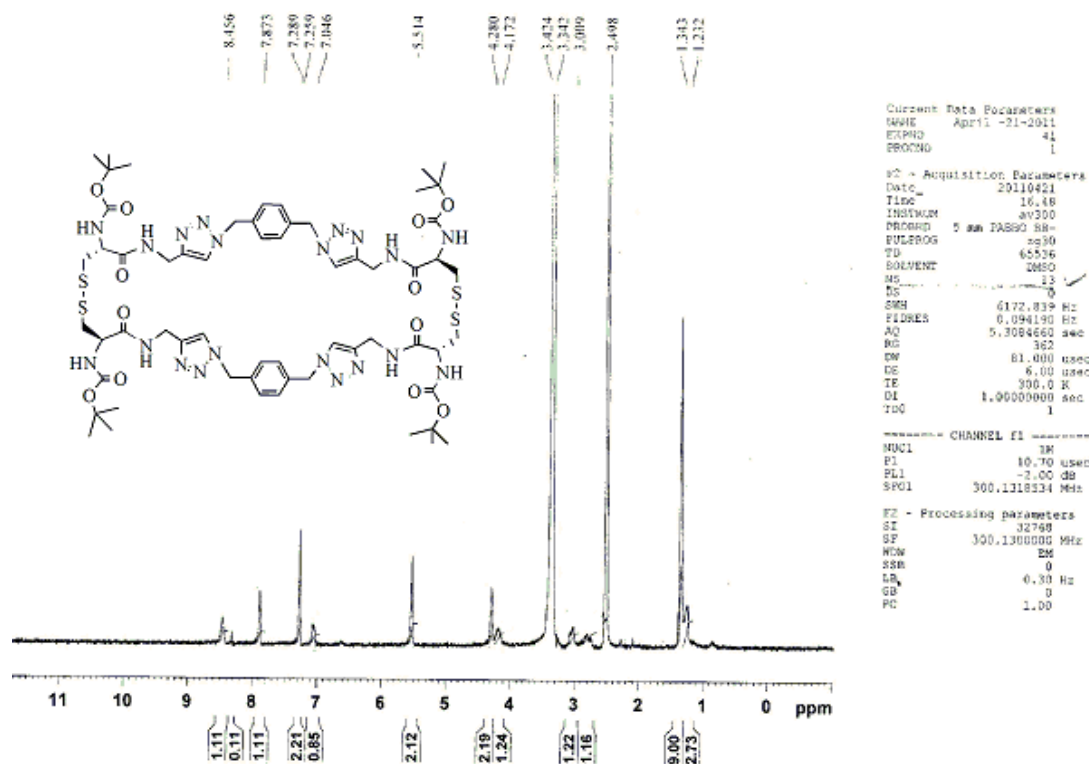

<sup>1</sup>H NMR (300 MHz, DMSO-*d*<sub>6</sub>) spectrum of compound 4

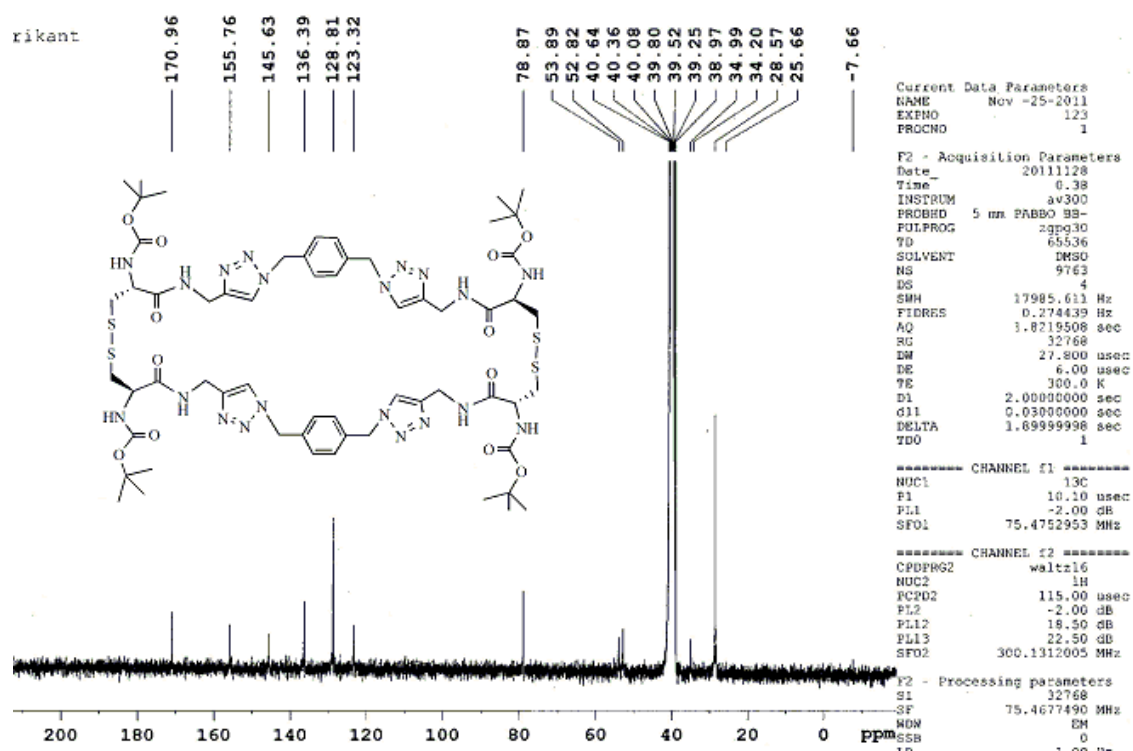

$^{13}\text{C}$  NMR (75 MHz,  $\text{DMSO}-d_6$ ) spectrum of compound 4

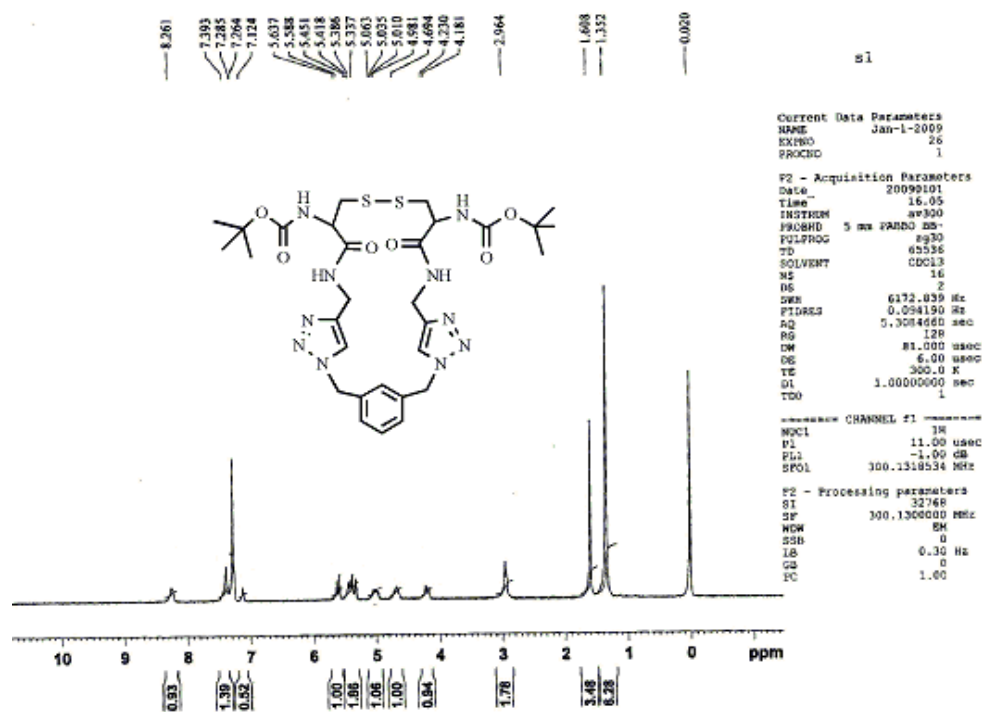

$^1\text{H}$  NMR (300 MHz,  $\text{CDCl}_3$ ) spectrum of compound 6



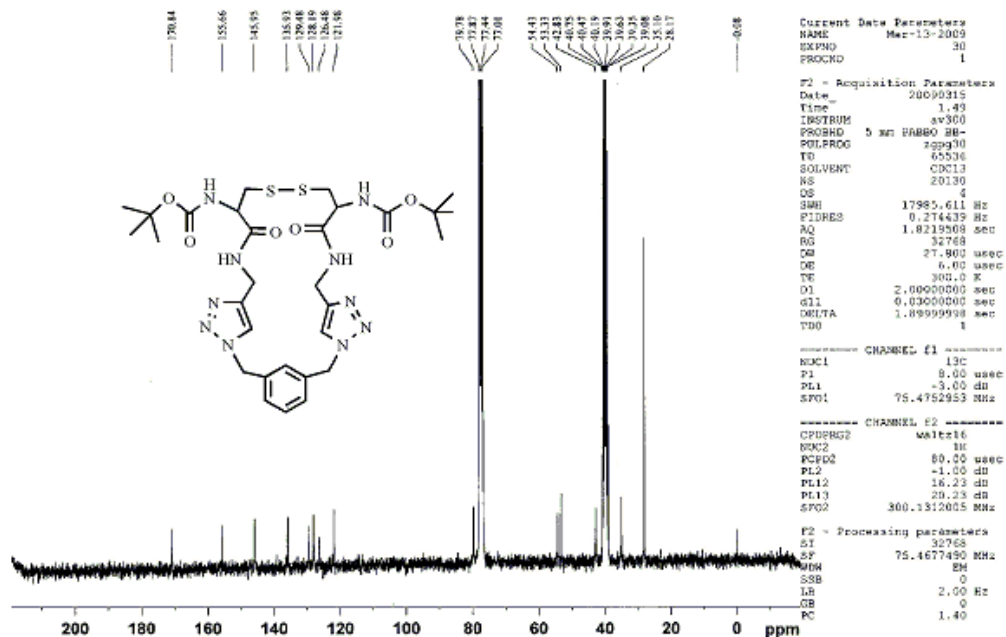

$^{13}\text{C}$  NMR (75 MHz,  $\text{CDCl}_3+\text{DMSO}-d_6$ ) spectrum of compound 6

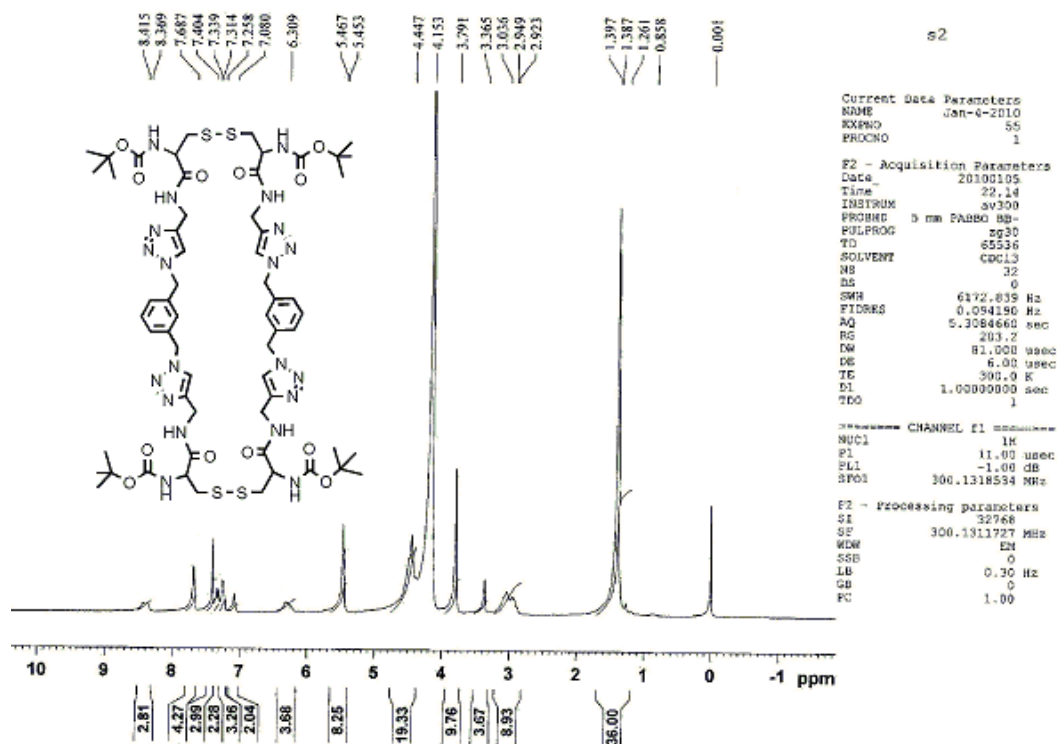

$^1\text{H}$  NMR (300 MHz,  $\text{CDCl}_3+\text{CD}_3\text{OD}$ ) spectrum of compound 7

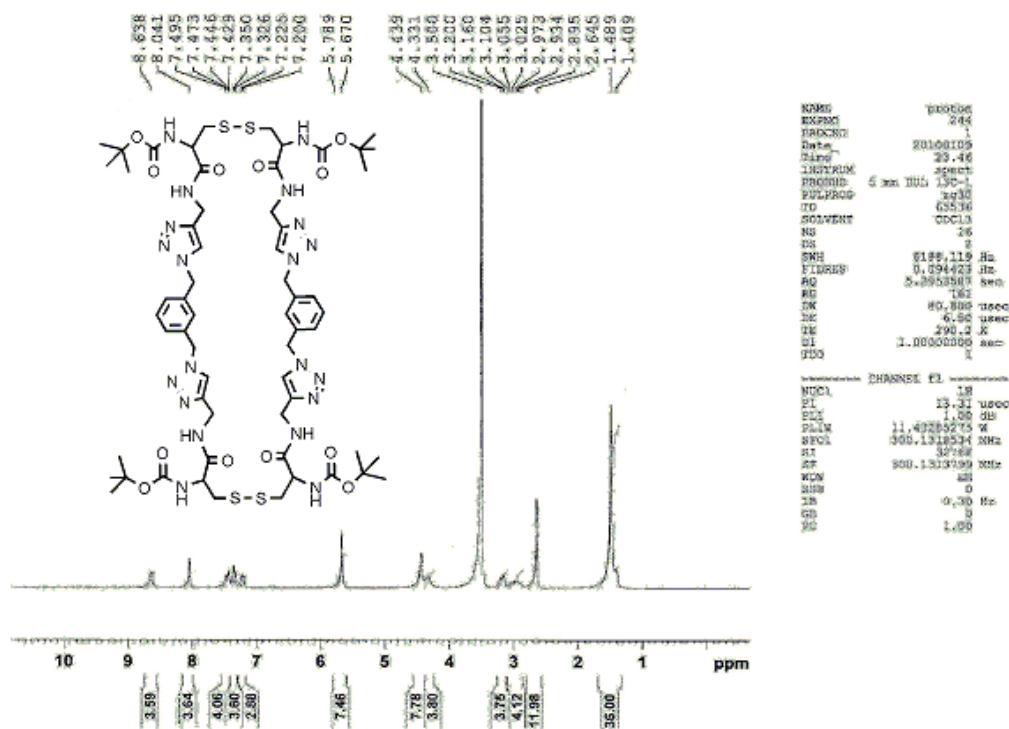

<sup>1</sup>H NMR (300 MHz, DMSO-*d*<sub>6</sub>) spectrum of compound 7

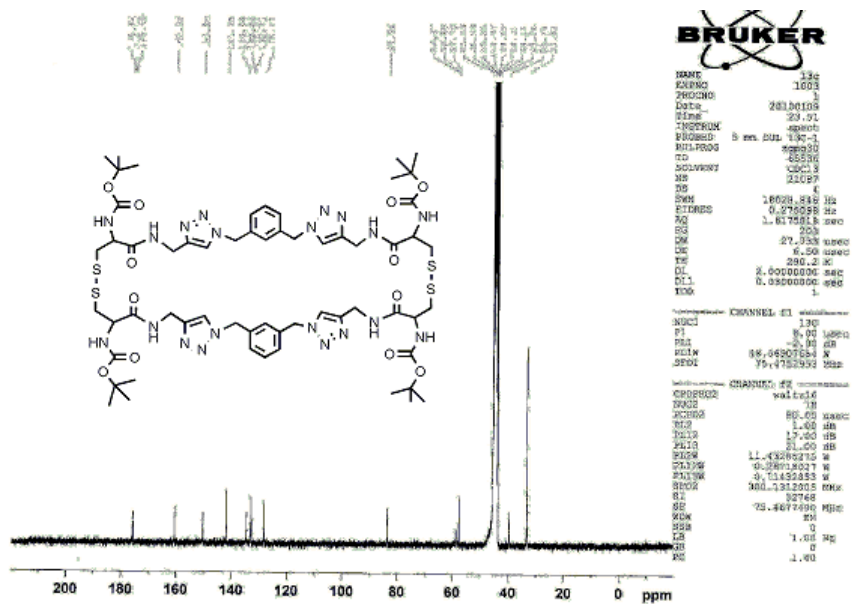

<sup>13</sup>C NMR (75 MHz, DMSO-*d*<sub>6</sub>) spectrum of compound 7

## **1. Microscopy Methods**

### **Scanning Electron Microscopy (SEM)**

The gels were made in appropriate solvent systems.. These samples were dried at room temperature on a piece of cleaved mica, attached to a stub via carbon tape and coated with ~10 nm of gold. Samples were analyzed using ZEISS EVO 50 SEM.

### **Transmission Electron Microscopy and High-Resolution Transmission Electron Microscopy (TEM and HR-TEM)**

Samples for TEM and HR-TEM were prepared by dissolving the compound in 4:1 methanol and chloroform mixture. A 2  $\mu$ l aliquot of the sample solution was placed on a 200 mesh copper grid. After 3 min., the grid was stained with 2 % phosphotungstate in water for 2 min. and the excess fluid was removed. Samples were viewed using a TECHNAI G2 (20S-TWIN) electron microscope.

### **Confocal Microscope**

Samples for confocal microscope were prepared by dissolving the macrocycle 4 in 4:1 methanol and chloroform mixture. To this was added 0.02 equivalent of Rhodamine B. A 10  $\mu$ l aliquot of the sample solution was dried on a cover glass and covered with a cover slip. The samples were viewed by using OLYMPUS Fv 1000 confocal microscope.

### **Atomic Force Microscopy (AFM)**

Sample images were acquired using a Park systems XE-70 atomic force microscope operating in non-contact mode in air. About 20  $\mu$ l aliquot of the sample solution was transferred onto freshly cleaved mica and allowed to dry.

## **II. Powder XRD measurement**

Powder X-ray diffraction data were collected on a Bruker D8 Advance diffractometer using Ni-filtered  $\text{CuK}\alpha$  radiation. Data were collected with a step size of  $0.02^\circ$  and a count time of 2s per step.

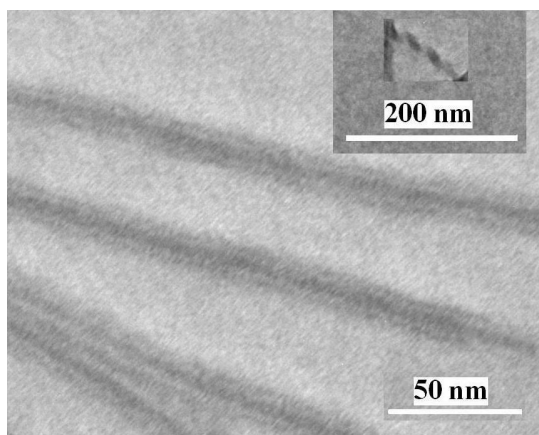

**Figure S1:** HR-TEM image of macrocycle **3**

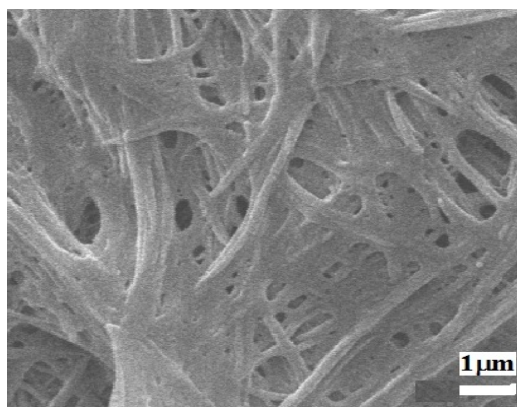

**Figure S2:** SEM image of gel formed from **3** in ethylacetate

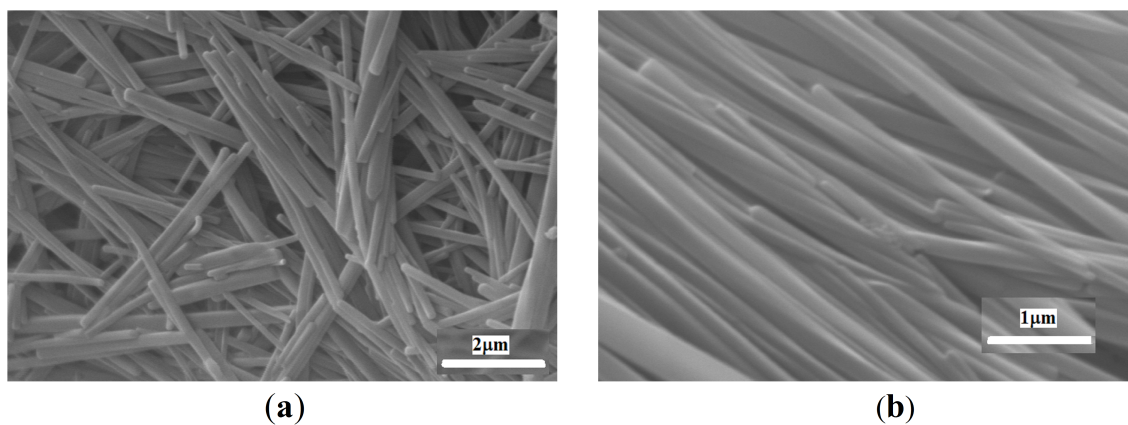

**Figure S3:** (a) Tube-like morphology of insoluble aggregate of macrocycle **3** observed in SEM (b) careful analysis of the SEM image showed twisted morphology.

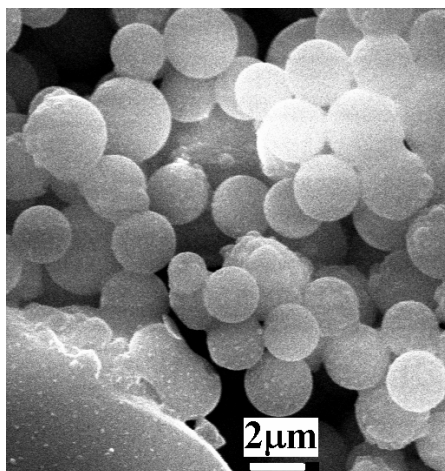

**Figure S4:** SEM image obtained from a concentrated solution **4**

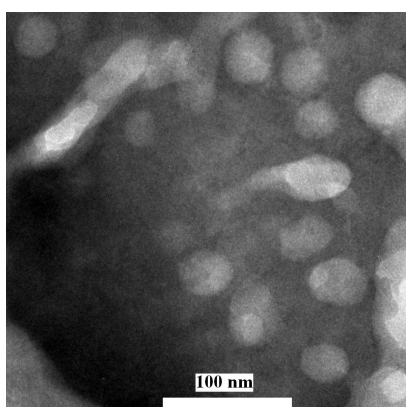

**Figure S5:** HR-TEM image of the macrocycle **4**

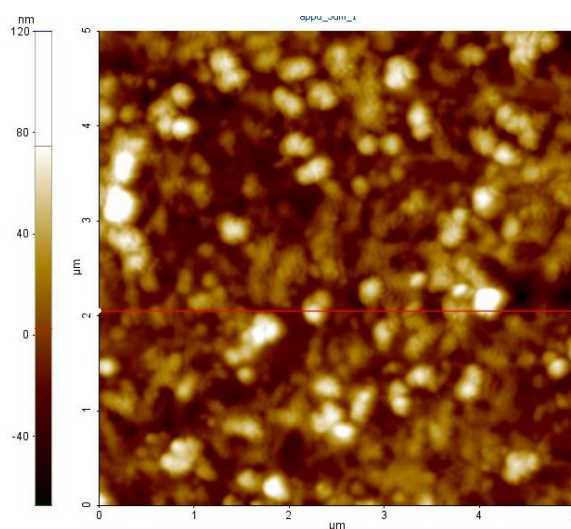

**Figure S6:** AFM image of macrocycle **4**. Measurement was made in non-contact mode

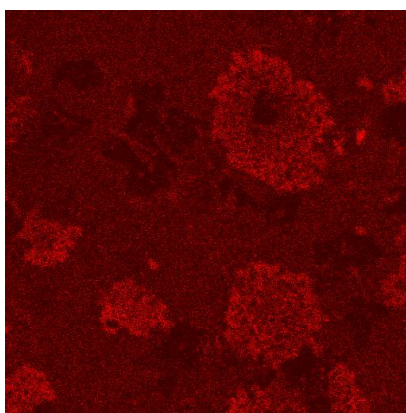

**Figure S7:** Confocal image of **4**, indicating leakage of the dye from the vesicles after reduction

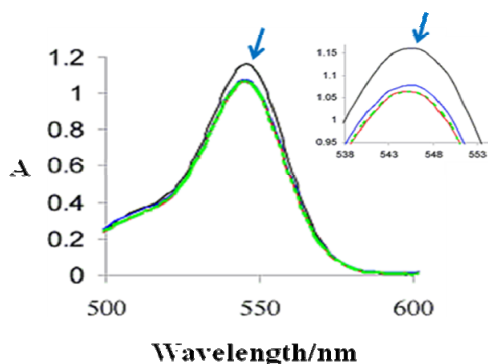

**Figure S8:** UV spectra (methanol and chloroform mixture (4:1)) of (i) Rhodamine B alone (violet), (ii) 30 min. after addition of 0.02 equivalents of **4** (blue), (iii) 3h after addition of 0.02 equivalents of **4** (green), (iv) 6h after addition of 0.02 equivalents of **4** (red)

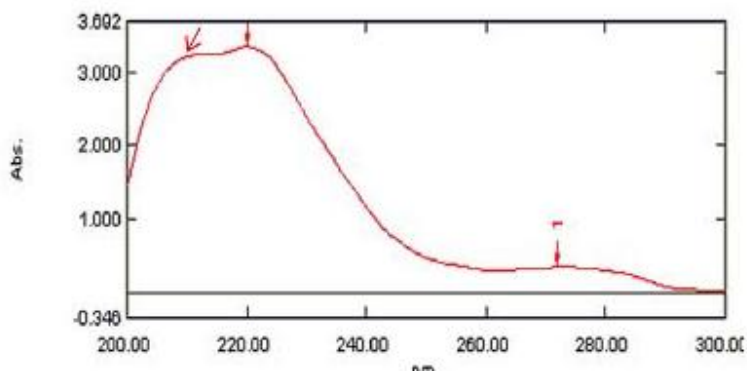

**Figure S9:** UV spectrum of **3** (0.0002M) in methanol

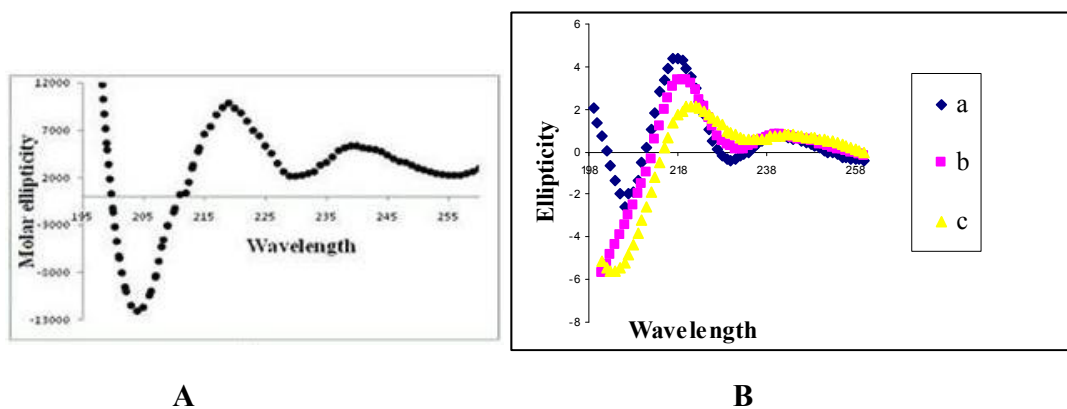

**Figure S10:** A) CD spectrum of **3** (0.0002M) in methanol B) Temperature dependent CD spectra of **3**: (a) at 10 °C, (b) at 45 °C, and (c) at 65 °C

| <b>Solvent</b>  | <b>Critical gel concentration (g/ml)</b> |
|-----------------|------------------------------------------|
| Chloroform      | 0.066                                    |
| Ethylacetate    | 0.0098                                   |
| Methanol        | 0.015                                    |
| Acetonitrile    | 0.008                                    |
| THF             | 0.015                                    |
| Acetone         | 0.02                                     |
| Dichloromethane | 0.018                                    |
| Ethanol         | 0.009                                    |
| Water           | No gel                                   |

**Table S1:** Gelation studies of macrocycle **3** in various solvents



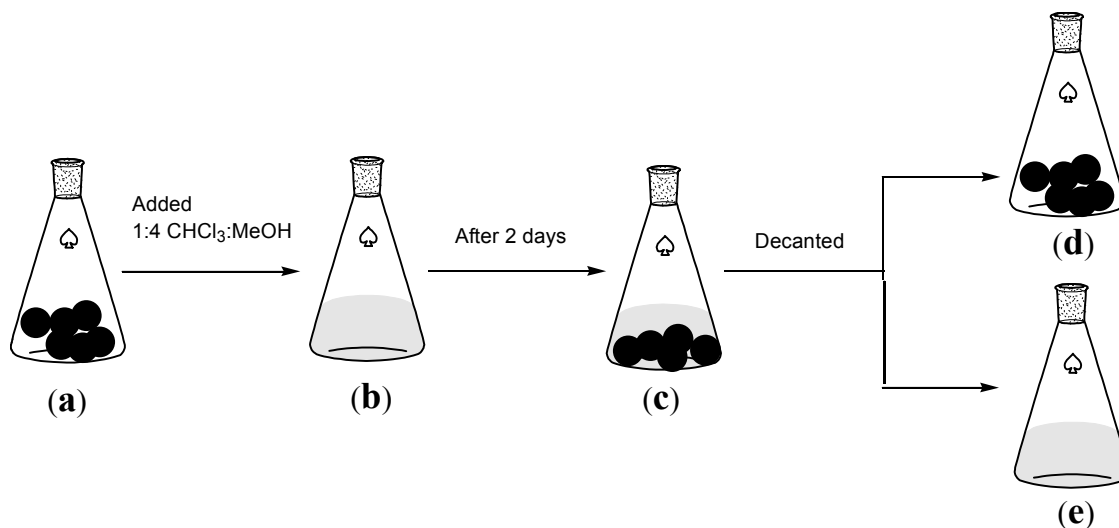

**Figure S11:** Macrocycle **3** (flask **a**) was dissolved in 1:4 chloroform:methanol (flask **b**). After keeping the solution for 2 days, insoluble material was observed (flask **c**). After decanting, the solid obtained (flask **d**) was analyzed by SEM and PXRD. See Figure S12 for PXRD and SEM of macrocycle. The insoluble aggregate (flask **d**) gave birefringence upon staining with congo red.

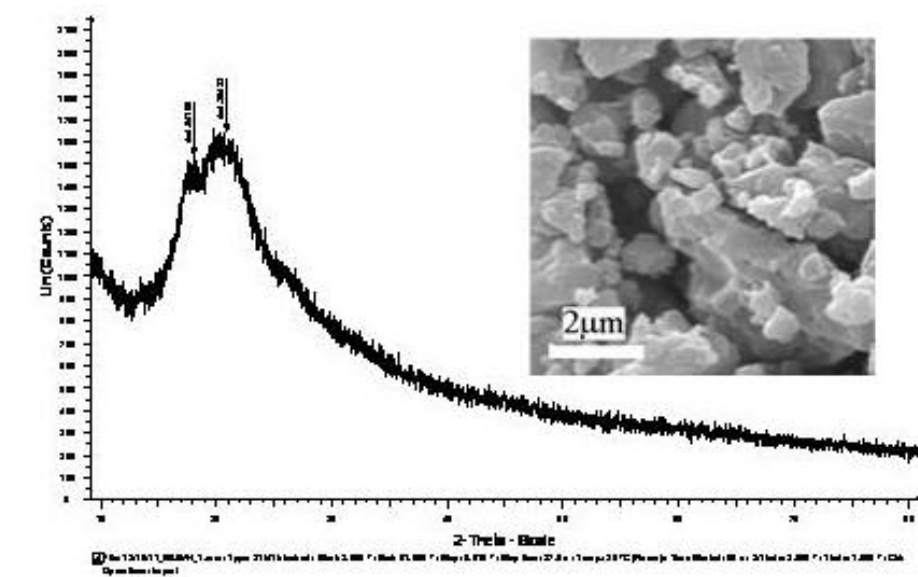

(a)

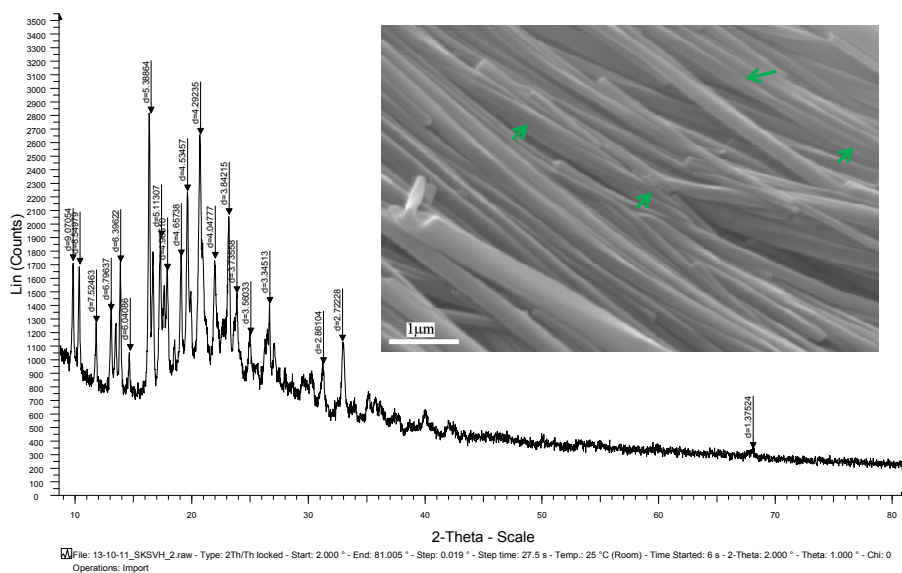

(b)

**Figure S12:** (a) PXRd of macrocycle **3** (flask a, figure S11) along with SEM image (b) PXRd of insoluble aggregate of macrocycle **3** (flask d, figure S11) along with SEM image. Green arrows inside the SEM image indicate twist in the morphology.

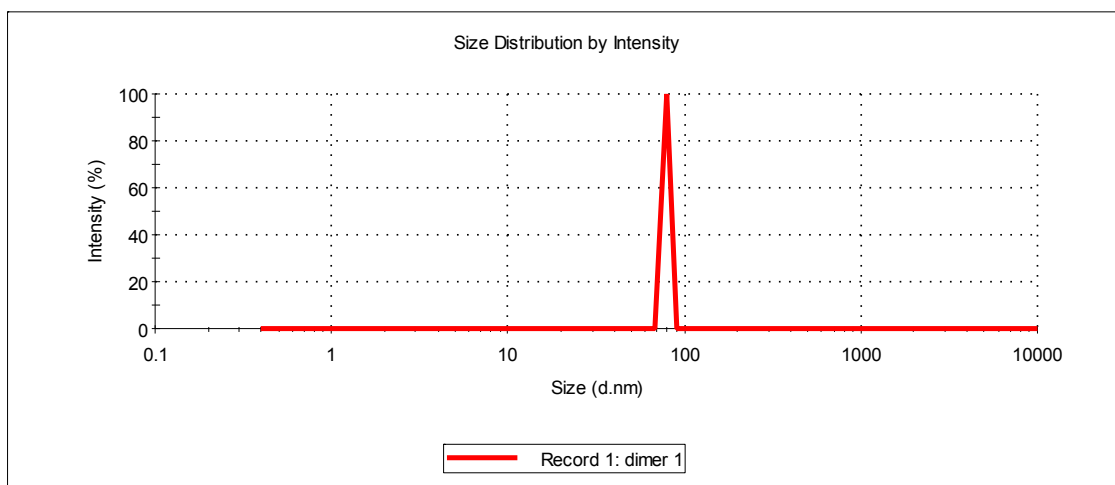

**Figure S13:** Dynamic light scattering study on macrocycle **4** in 1:4 chloroform:methanol. The concentration of **4** was 0.23 mM.

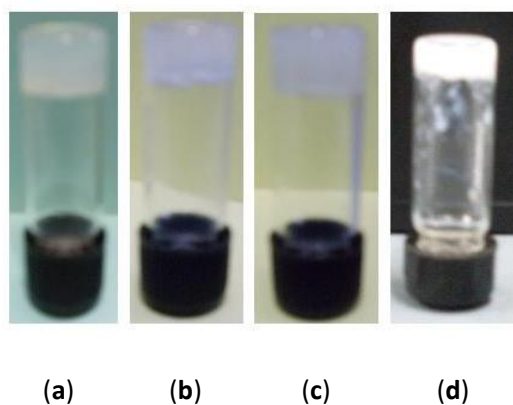

**Figure S14:** Photographs of gels formed from **3** in (a) chloroform (b) dioxane (c) ethylacetate (d) methanol
